# Supplementary material for: Epigenetic programs shaping lung metastasis in triple-negative breast cancer
Source: Research Square preprint supplement (doi:10.21203/rs.3.rs-7659153/v1), 2025-11-05
Supplement: Supplementary file 1 [file 07b2861909ba8017d26502e0.xlsx]

## Sheet: Supplementary Table 2
Supplementary Table 2. Clinical data from cases employed in the evaluation of lung metastases-free survival.
GEO ID	Sample Name	Sample Type	Cohort	Lung Metastasis Event	LMFS Years
GSM50035	B114-T	Primary Breast Cancer	MKSCC	1	1.84
GSM50040	B57-T	Primary Breast Cancer	MKSCC	0	7.57
GSM50042	B61-T	Primary Breast Cancer	MKSCC	0	4.41
GSM50045	B66-T	Primary Breast Cancer	MKSCC	0	10.75
GSM50046	B67-T	Primary Breast Cancer	MKSCC	0	8.04
GSM50048	B69-T	Primary Breast Cancer	MKSCC	0	6.07
GSM50052	B75-T	Primary Breast Cancer	MKSCC	0	4.56
GSM50054	B77-T	Primary Breast Cancer	MKSCC	0	4.05
GSM50060	B43-T	Primary Breast Cancer	MKSCC	1	3.47
GSM50061	B44-T	Primary Breast Cancer	MKSCC	1	3.96
GSM50063	B46-T	Primary Breast Cancer	MKSCC	1	3.11
GSM50064	B47-T	Primary Breast Cancer	MKSCC	1	1.34
GSM50066	B49-T	Primary Breast Cancer	MKSCC	1	1.24
GSM50067	B50-T	Primary Breast Cancer	MKSCC	1	0.77
GSM50069	B73-T	Primary Breast Cancer	MKSCC	1	3.83
GSM50070	B98-T	Primary Breast Cancer	MKSCC	0	6.96
GSM50071	B100-T	Primary Breast Cancer	MKSCC	0	5.82
GSM50073	B102-T	Primary Breast Cancer	MKSCC	0	7.25
GSM50079	B115-T	Primary Breast Cancer	MKSCC	0	6.52
GSM50089	B89-T	Primary Breast Cancer	MKSCC	0	8.74
GSM50092	B93-T	Primary Breast Cancer	MKSCC	0	6.45
GSM50093	B97-T	Primary Breast Cancer	MKSCC	0	7.86
GSM50094	B103-T	Primary Breast Cancer	MKSCC	1	3.22
GSM50096	B109-T	Primary Breast Cancer	MKSCC	1	1.38
GSM50102	B94-T	Primary Breast Cancer	MKSCC	0	1.03
GSM50106	B7-T	Primary Breast Cancer	MKSCC	1	1.58
GSM50107	B10-T	Primary Breast Cancer	MKSCC	0	6.21
GSM50110	B13-T	Primary Breast Cancer	MKSCC	0	5.19
GSM50119	B26-T	Primary Breast Cancer	MKSCC	0	4.18
GSM50123	B2-T	Primary Breast Cancer	MKSCC	0	3.9
GSM120649	ER negative human primary breast tumor EA02014_41243_H133A_JA-076	Primary Breast Cancer	Erasmus	0	11.3388
GSM120651	ER negative human primary breast tumor EA02014_41245_H133A_JA-123	Primary Breast Cancer	Erasmus	0	7.36066
GSM120652	ER negative human primary breast tumor EA02014_41246_H133A_JA-401	Primary Breast Cancer	Erasmus	0	1.01913
GSM120653	ER negative human primary breast tumor EA02014_41247_H133A_JA-120	Primary Breast Cancer	Erasmus	0	7.99727
GSM120654	ER negative human primary breast tumor EA02014_41248_H133A_JA-131	Primary Breast Cancer	Erasmus	0	8.10929
GSM120655	ER negative human primary breast tumor EA02014_41249_H133A_JA-243	Primary Breast Cancer	Erasmus	1	0.84153
GSM120656	ER negative human primary breast tumor EA02014_41250_H133A_JA-245	Primary Breast Cancer	Erasmus	1	1.87432
GSM120657	ER negative human primary breast tumor EA02014_41251_H133A_JA-632	Primary Breast Cancer	Erasmus	0	5.09016
GSM120658	ER negative human primary breast tumor EA02014_41252_H133A_JA-746	Primary Breast Cancer	Erasmus	0	10.2213
GSM120659	ER negative human primary breast tumor EA02014_41253_H133A_JA-755	Primary Breast Cancer	Erasmus	0	8.75683
GSM120660	ER negative human primary breast tumor EA02014_41254_H133A_JA-812	Primary Breast Cancer	Erasmus	0	9.70492
GSM120661	ER negative human primary breast tumor EA02014_41255_H133A_JA-838	Primary Breast Cancer	Erasmus	0	7.21312
GSM120662	ER negative human primary breast tumor EA02014_41256_H133A_JA-872	Primary Breast Cancer	Erasmus	0	5.72951
GSM120663	ER negative human primary breast tumor EA02014_41257_H133A_JA-248	Primary Breast Cancer	Erasmus	1	3.66257
GSM120664	ER negative human primary breast tumor EA02014_41258_H133A_JA-282	Primary Breast Cancer	Erasmus	0	6.93169
GSM120665	ER negative human primary breast tumor EA02014_41259_H133A_JA-929	Primary Breast Cancer	Erasmus	0	13.041
GSM120666	ER negative human primary breast tumor EA02014_41260_H133A_JA-941	Primary Breast Cancer	Erasmus	0	7.28962
GSM120667	ER negative human primary breast tumor EA02014_41261_H133A_JA-1060	Primary Breast Cancer	Erasmus	0	5.93989
GSM120668	ER negative human primary breast tumor EA02014_41262_H133A_JA-1222	Primary Breast Cancer	Erasmus	1	0.598361
GSM120669	ER negative human primary breast tumor EA02014_41263_H133A_JA-1582	Primary Breast Cancer	Erasmus	0	8.01913
GSM120670	ER negative human primary breast tumor EA02014_41264_H133A_JA-1487	Primary Breast Cancer	Erasmus	0	5.87978
GSM120671	ER negative human primary breast tumor EA02014_41265_H133A_JA-1069	Primary Breast Cancer	Erasmus	1	2.21995
GSM120672	ER negative human primary breast tumor EA02014_41266_H133A_JA-1412	Primary Breast Cancer	Erasmus	0	10.6448
GSM120673	ER negative human primary breast tumor EA02014_41267_H133A_JA-1455	Primary Breast Cancer	Erasmus	0	5.35792
GSM120674	ER negative human primary breast tumor EA02014_41268_H133A_JA-1482	Primary Breast Cancer	Erasmus	0	7.19399
GSM120675	ER negative human primary breast tumor EA02014_41269_H133A_JA-1497	Primary Breast Cancer	Erasmus	0	9.95355
GSM120676	ER negative human primary breast tumor EA02014_41270_H133A_JA-1501	Primary Breast Cancer	Erasmus	0	6.14208
GSM120677	ER negative human primary breast tumor EA02014_41271_H133A_JA-1524	Primary Breast Cancer	Erasmus	0	5.69672
GSM120678	ER negative human primary breast tumor EA02014_41272_H133A_JA-1416	Primary Breast Cancer	Erasmus	0	8.86885
GSM120679	ER negative human primary breast tumor EA02014_41273_H133A_JA-1535	Primary Breast Cancer	Erasmus	0	3.46995
GSM120680	ER negative human primary breast tumor EA02014_41274_H133A_JA-1563	Primary Breast Cancer	Erasmus	0	8.60656
GSM120681	ER negative human primary breast tumor EA02014_41275_H133A_JA-1568	Primary Breast Cancer	Erasmus	0	9.58743
GSM120682	ER negative human primary breast tumor EA02014_41276_H133A_JA-1571	Primary Breast Cancer	Erasmus	0	6.36066
GSM120683	ER negative human primary breast tumor EA02014_41277_H133A_JA-1593	Primary Breast Cancer	Erasmus	0	10.571
GSM120684	ER negative human primary breast tumor EA02014_41278_H133A_JA-1622	Primary Breast Cancer	Erasmus	0	10.929
GSM120685	ER negative human primary breast tumor EA02014_41279_H133A_JA-1650	Primary Breast Cancer	Erasmus	0	7.32787
GSM120686	ER negative human primary breast tumor EA02014_41280_H133A_JA-1661	Primary Breast Cancer	Erasmus	0	6.73771
GSM120687	ER negative human primary breast tumor EA02014_41282_H133A_JA-1555	Primary Breast Cancer	Erasmus	0	0.765027
GSM120688	ER negative human primary breast tumor EA02014_41283_H133A_JA-1589	Primary Breast Cancer	Erasmus	0	10.8415
GSM120689	ER negative human primary breast tumor EA02014_41284_H133A_JA-854	Primary Breast Cancer	Erasmus	0	5
GSM120690	ER negative human primary breast tumor EA02014_41285_H133A_JA-1821	Primary Breast Cancer	Erasmus	0	7.31967
GSM120691	ER negative human primary breast tumor EA02014_41286_H133A_JA-1828	Primary Breast Cancer	Erasmus	0	8.56558
GSM120692	ER negative human primary breast tumor EA02014_41287_H133A_JA-1858	Primary Breast Cancer	Erasmus	0	7.38525
GSM120693	ER negative human primary breast tumor EA02014_41288_H133A_JA-1853	Primary Breast Cancer	Erasmus	0	5.21858
GSM120694	ER negative human primary breast tumor EA02014_41289_H133A_JA-1871	Primary Breast Cancer	Erasmus	0	7.1776
GSM120695	ER negative human primary breast tumor EA02014_41290_H133A_JA-1938	Primary Breast Cancer	Erasmus	0	7.48907
GSM120696	ER negative human primary breast tumor EA02014_41291_H133A_JA-1939	Primary Breast Cancer	Erasmus	0	12.6257
GSM120697	ER negative human primary breast tumor EA02014_41292_H133A_JA-1949	Primary Breast Cancer	Erasmus	0	9.28688
GSM120698	ER negative human primary breast tumor EA02014_41293_H133A_JA-1966	Primary Breast Cancer	Erasmus	0	5.12295
GSM120699	ER negative human primary breast tumor EA02014_41294_H133A_JA-1967	Primary Breast Cancer	Erasmus	0	6.64481
GSM120700	ER negative human primary breast tumor EA02014_41295_H133A_JA-1976	Primary Breast Cancer	Erasmus	0	6.06011
GSM120701	ER negative human primary breast tumor EA02014_41296_H133A_JA-1978	Primary Breast Cancer	Erasmus	0	5.74863
GSM120702	ER negative human primary breast tumor EA02014_41297_H133A_JA-2001	Primary Breast Cancer	Erasmus	1	0.363388
GSM120703	ER negative human primary breast tumor EA02014_41298_H133A_JA-2007	Primary Breast Cancer	Erasmus	0	7.60109
GSM120704	ER negative human primary breast tumor EA02014_41299_H133A_JA-2021	Primary Breast Cancer	Erasmus	0	7.59563
GSM120705	ER negative human primary breast tumor EA02014_41300_H133A_JA-2025	Primary Breast Cancer	Erasmus	0	6.90984
GSM120706	ER negative human primary breast tumor EA02014_41301_H133A_JA-2038	Primary Breast Cancer	Erasmus	0	8.51366
GSM120707	ER negative human primary breast tumor EA02014_41302_H133A_JA-2024	Primary Breast Cancer	Erasmus	1	1.80055
