# Supplementary material for: Epigenetic programs shaping lung metastasis in triple-negative breast cancer
Source: Research Square preprint supplement (doi:10.21203/rs.3.rs-7659153/v1), 2025-11-05
Supplement: Supplementary file 1 [file a94f43f619fa7f20a7774dbf.pdf]

Supplementary Figure 1

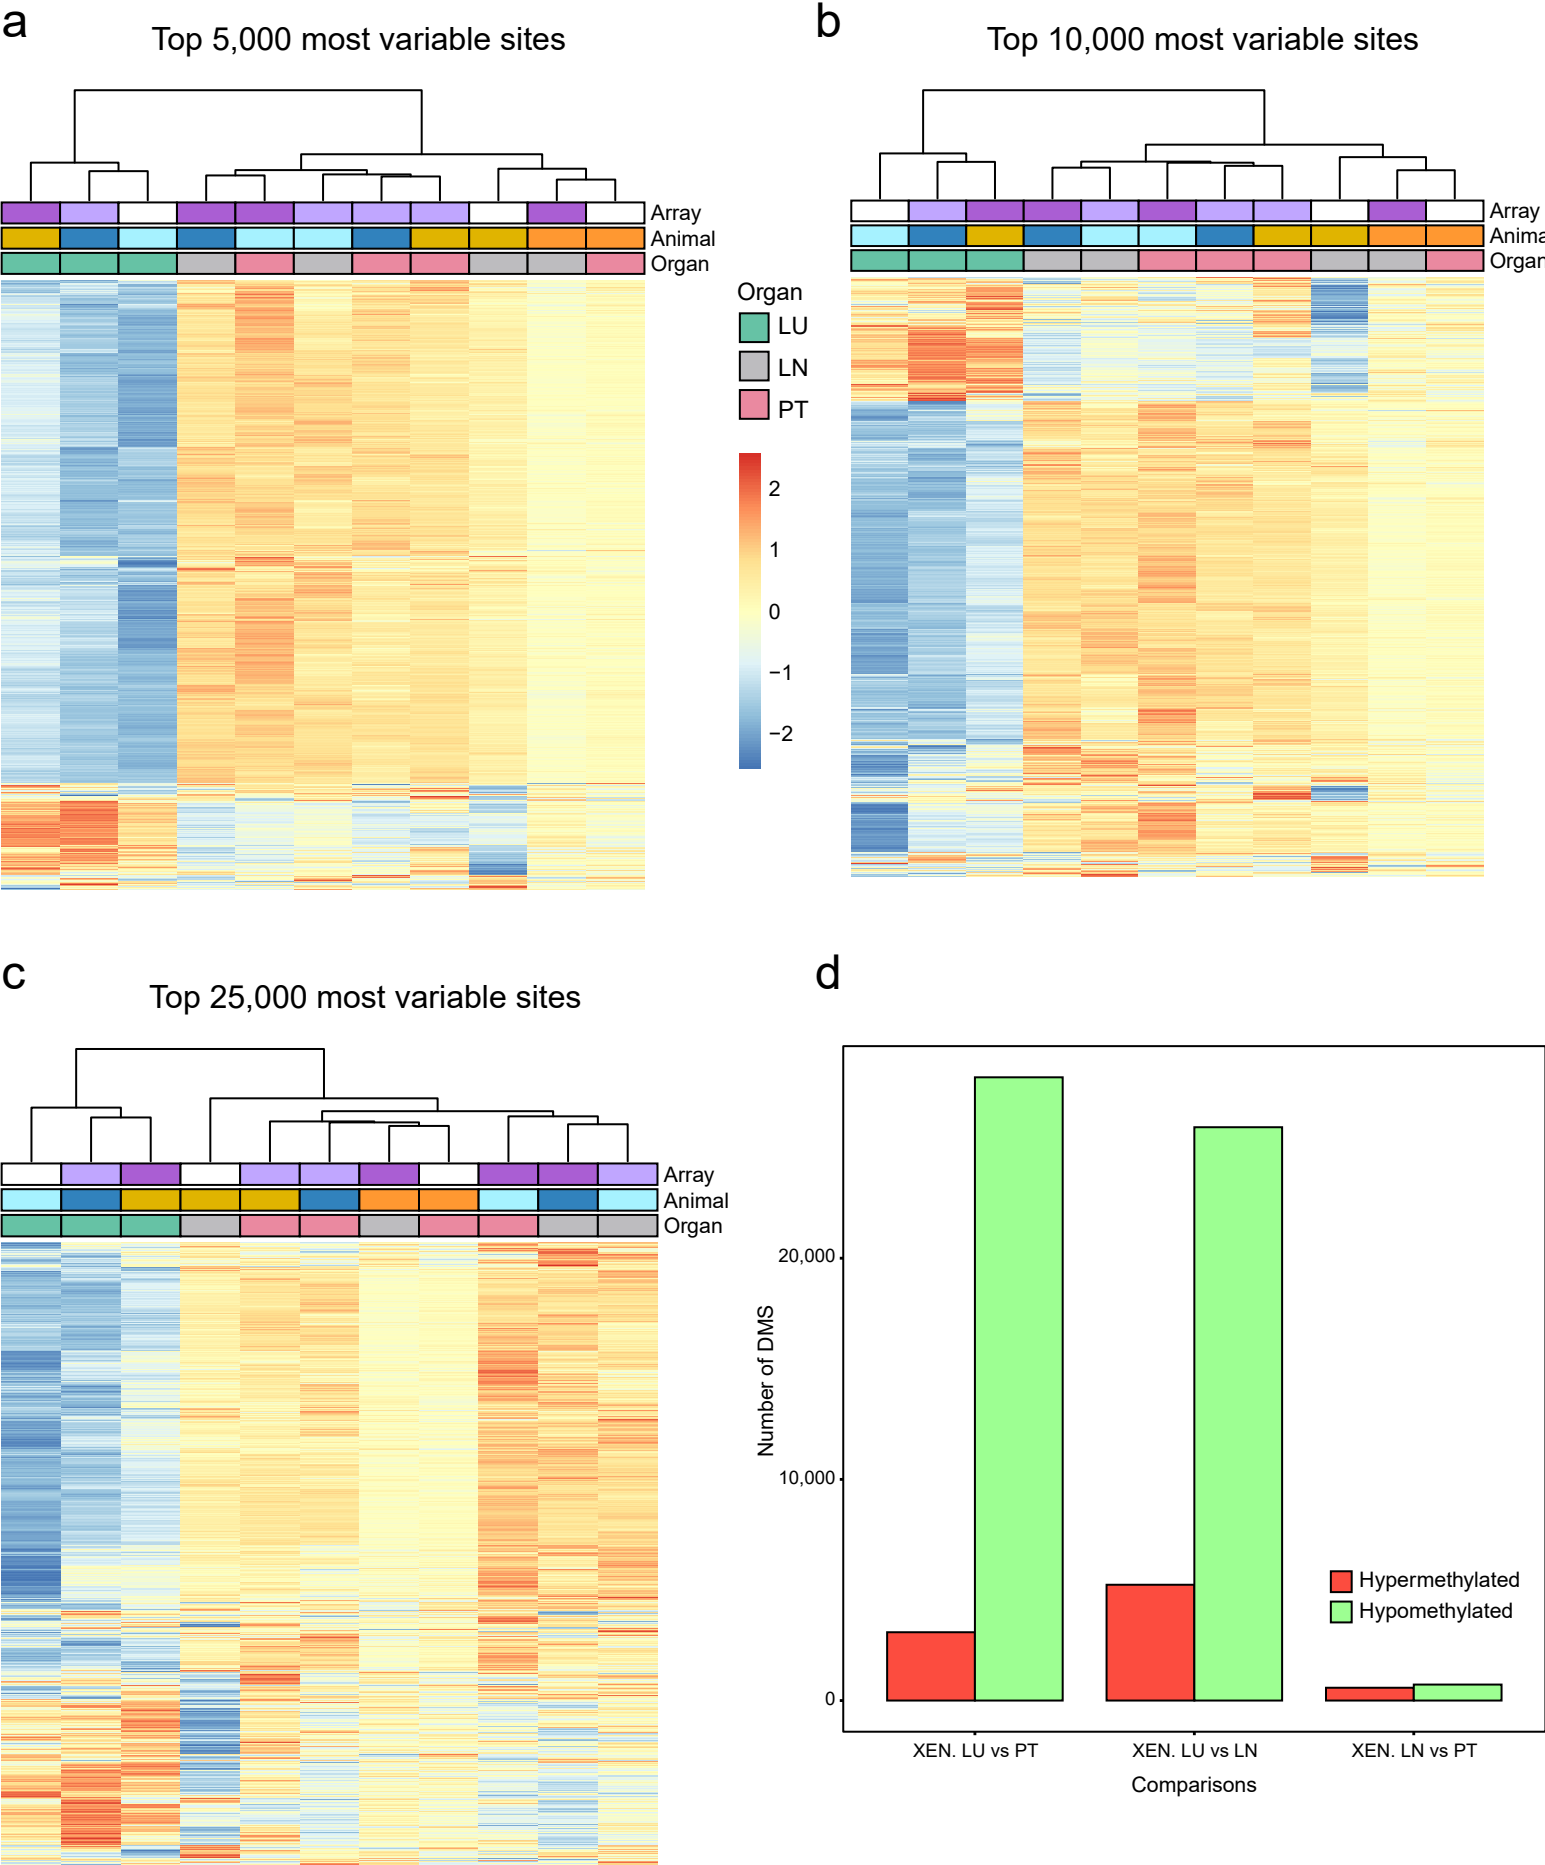

**Supplementary Figure 1. The epigenomic landscape of TNBC lung metastases, lymph node metastases, and primary tumors in the XEN model. a)** Heatmap of the 5,000, **b)** 10,000, **c)** and 25,000 most variable sites. **d)** Barplot displaying the number of DMS between XEN comparisons (LU vs. PT; LU vs. LN; LN vs PT). Hypomethylated events are in green, and hypermethylated in red.

Supplementary Figure 2

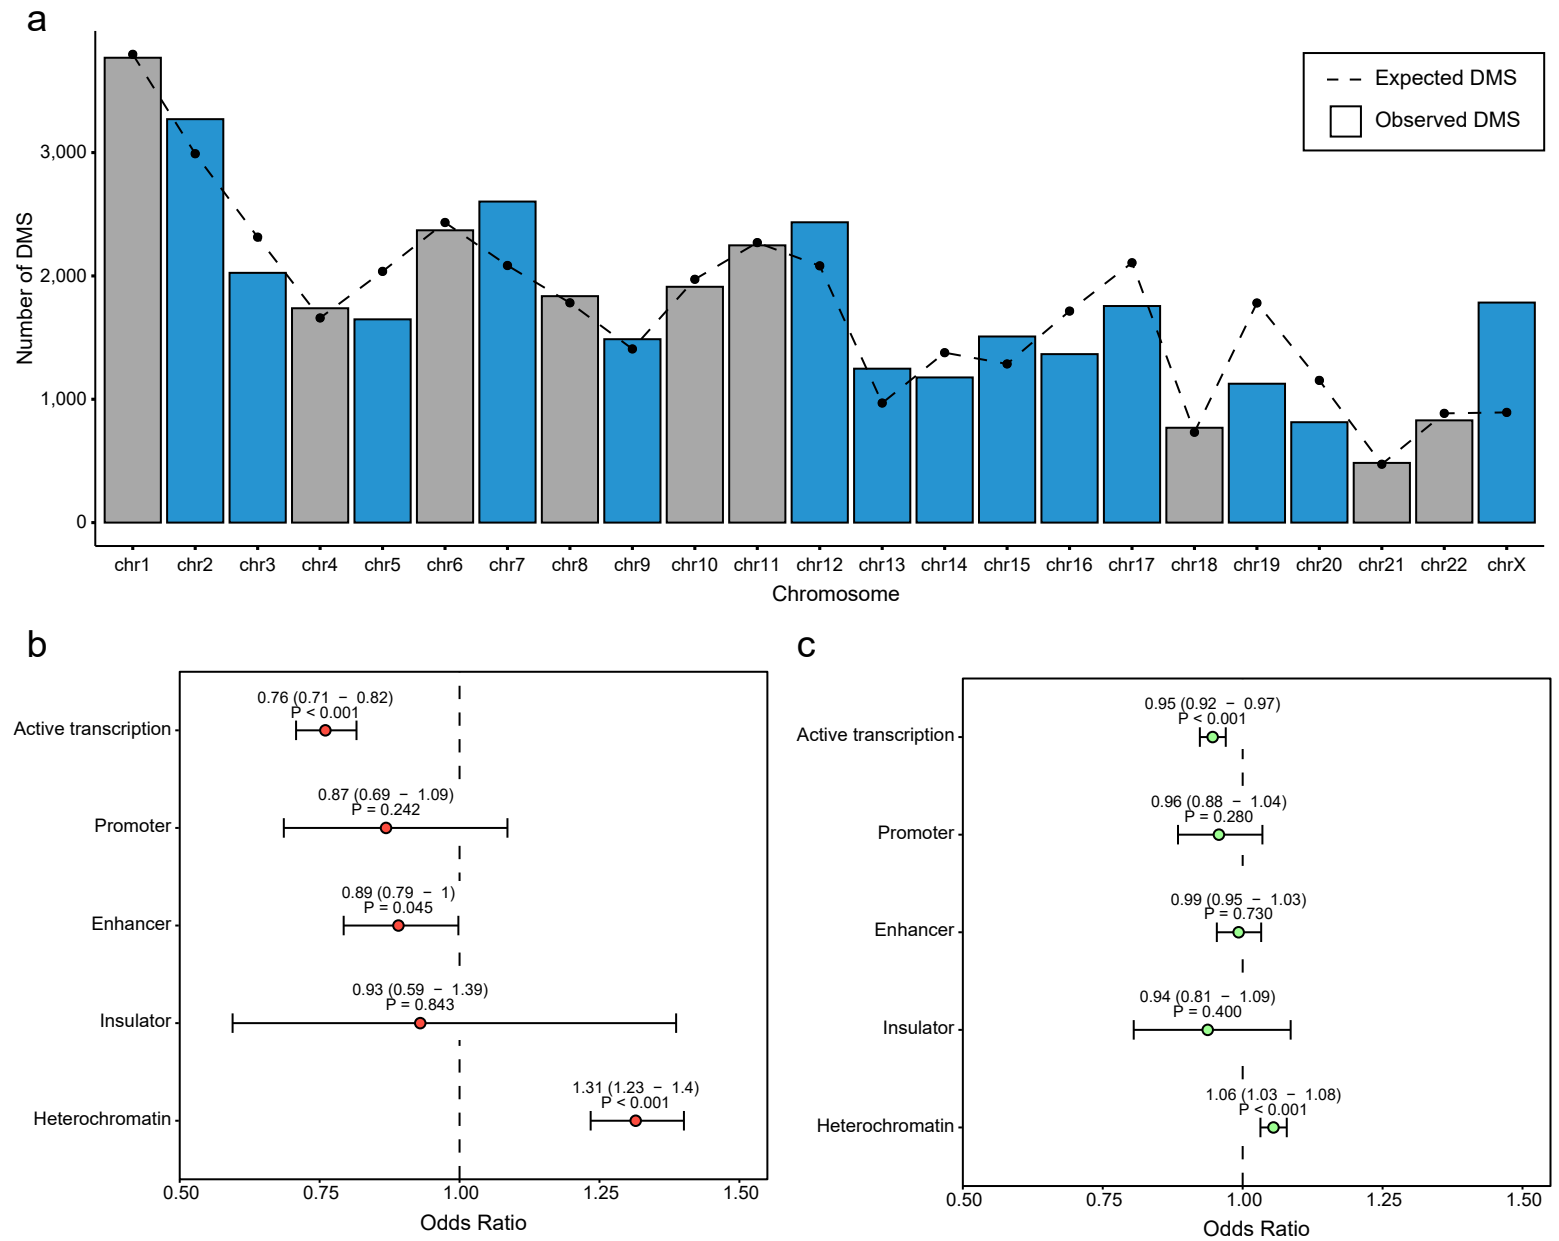

**Supplementary Figure 2: Chromatin states and DNA methylation overlap between TNBC lung metastases and lymph node and primary tumors.** **a)** Number of DMS per-chromosome expected and observed in TNBC lung metastases compared to lymph node and primary tumors. Gray bars indicate non-significant differences, while blue bars represent those chromosomes with significant enrichment or depletion (P-adjusted < 0.05). **b)** Forest plot displaying the odds ratio with 95% confidence intervals for hypermethylated and **c)** hypomethylated DMS across different chromatin states.



Supplementary Figure 3

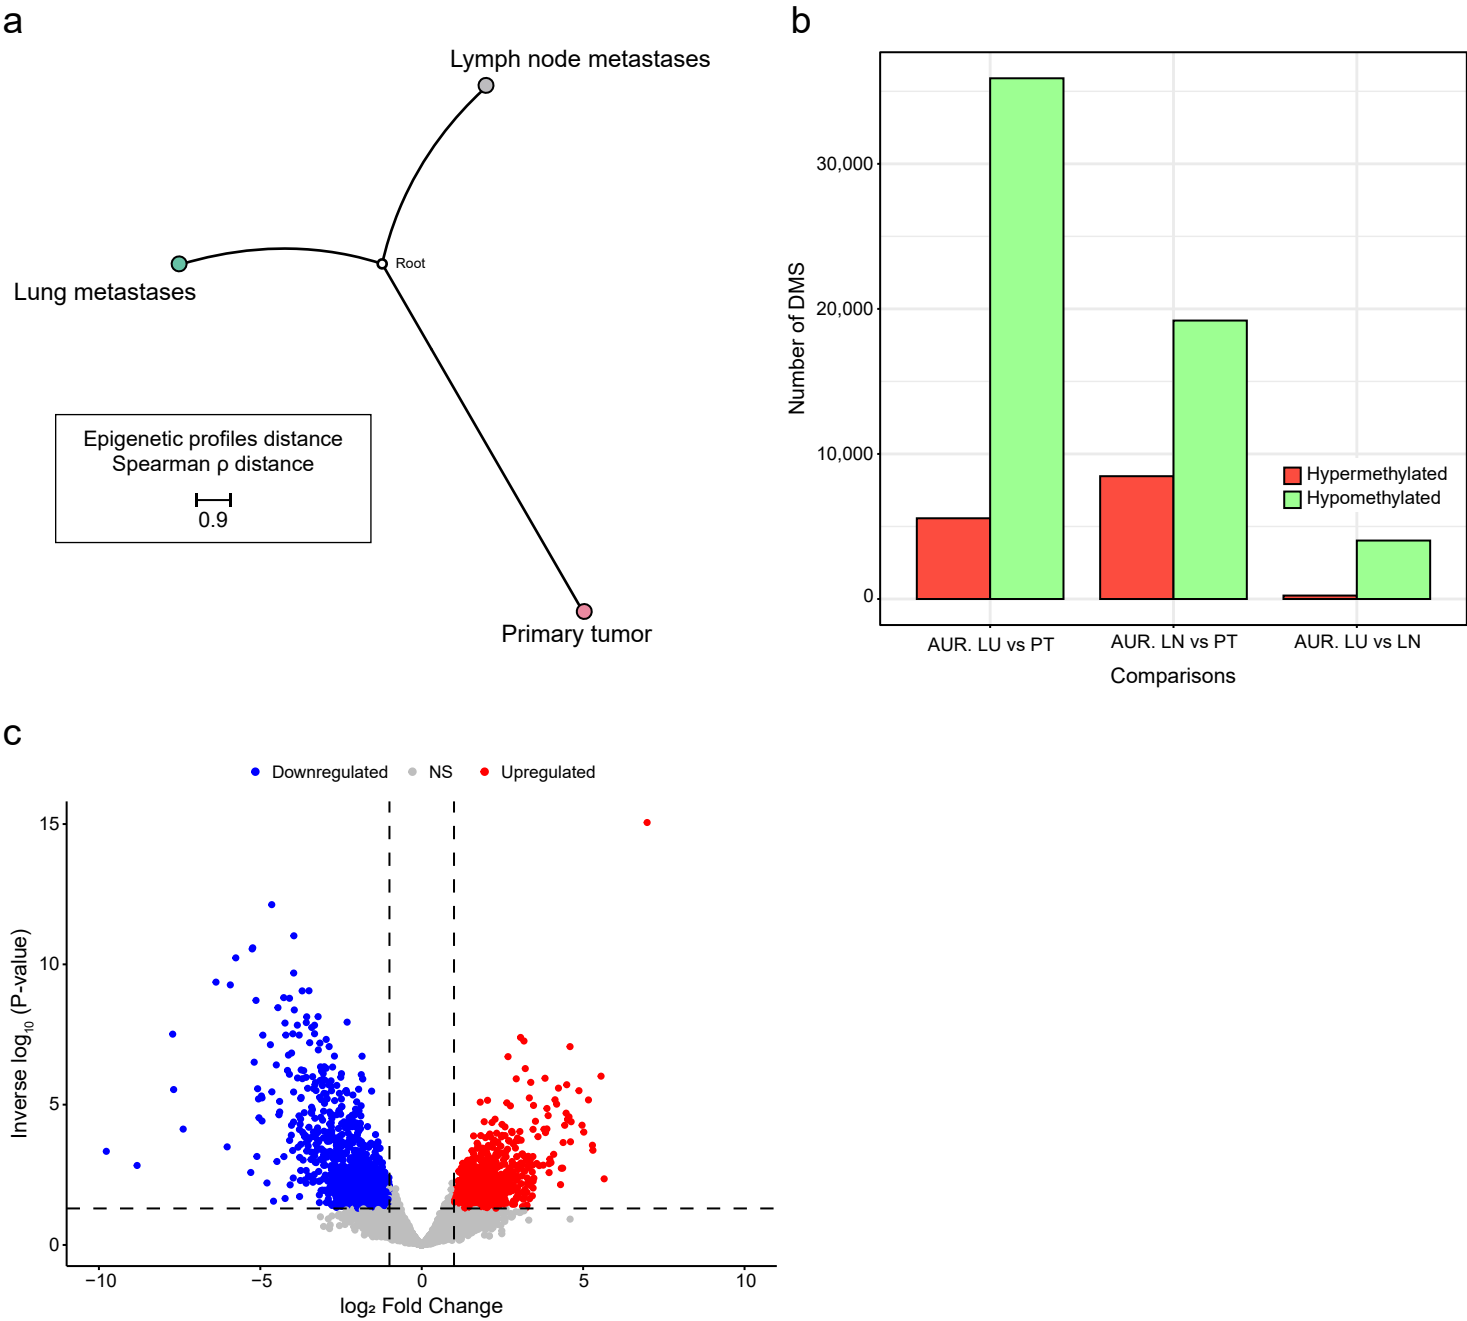

**Supplementary Figure 3. DNA methylation and gene expression differences between TNBC lung and lymph node metastases and primary tumors from the AURORA US cohort.** **a)** A phylogenetic tree representing DNAm-based Spearman  $\rho$  distance between TNBC tumors from different sites. **b)** Barplot displaying the number of DMS between AUR comparisons. Hypomethylated events are shown in green, and hypermethylated events are shown in red. **c)** Volcano plot represents the  $\log_2$  fold change of gene expression (x-axis) and the inverse  $\log_{10}$  P-value (y-axis) comparison between lung metastases and primary tumors from the AUR cohort. 1,146 genes were downregulated (blue) and 1,220 were upregulated (red).

Supplementary Figure 4

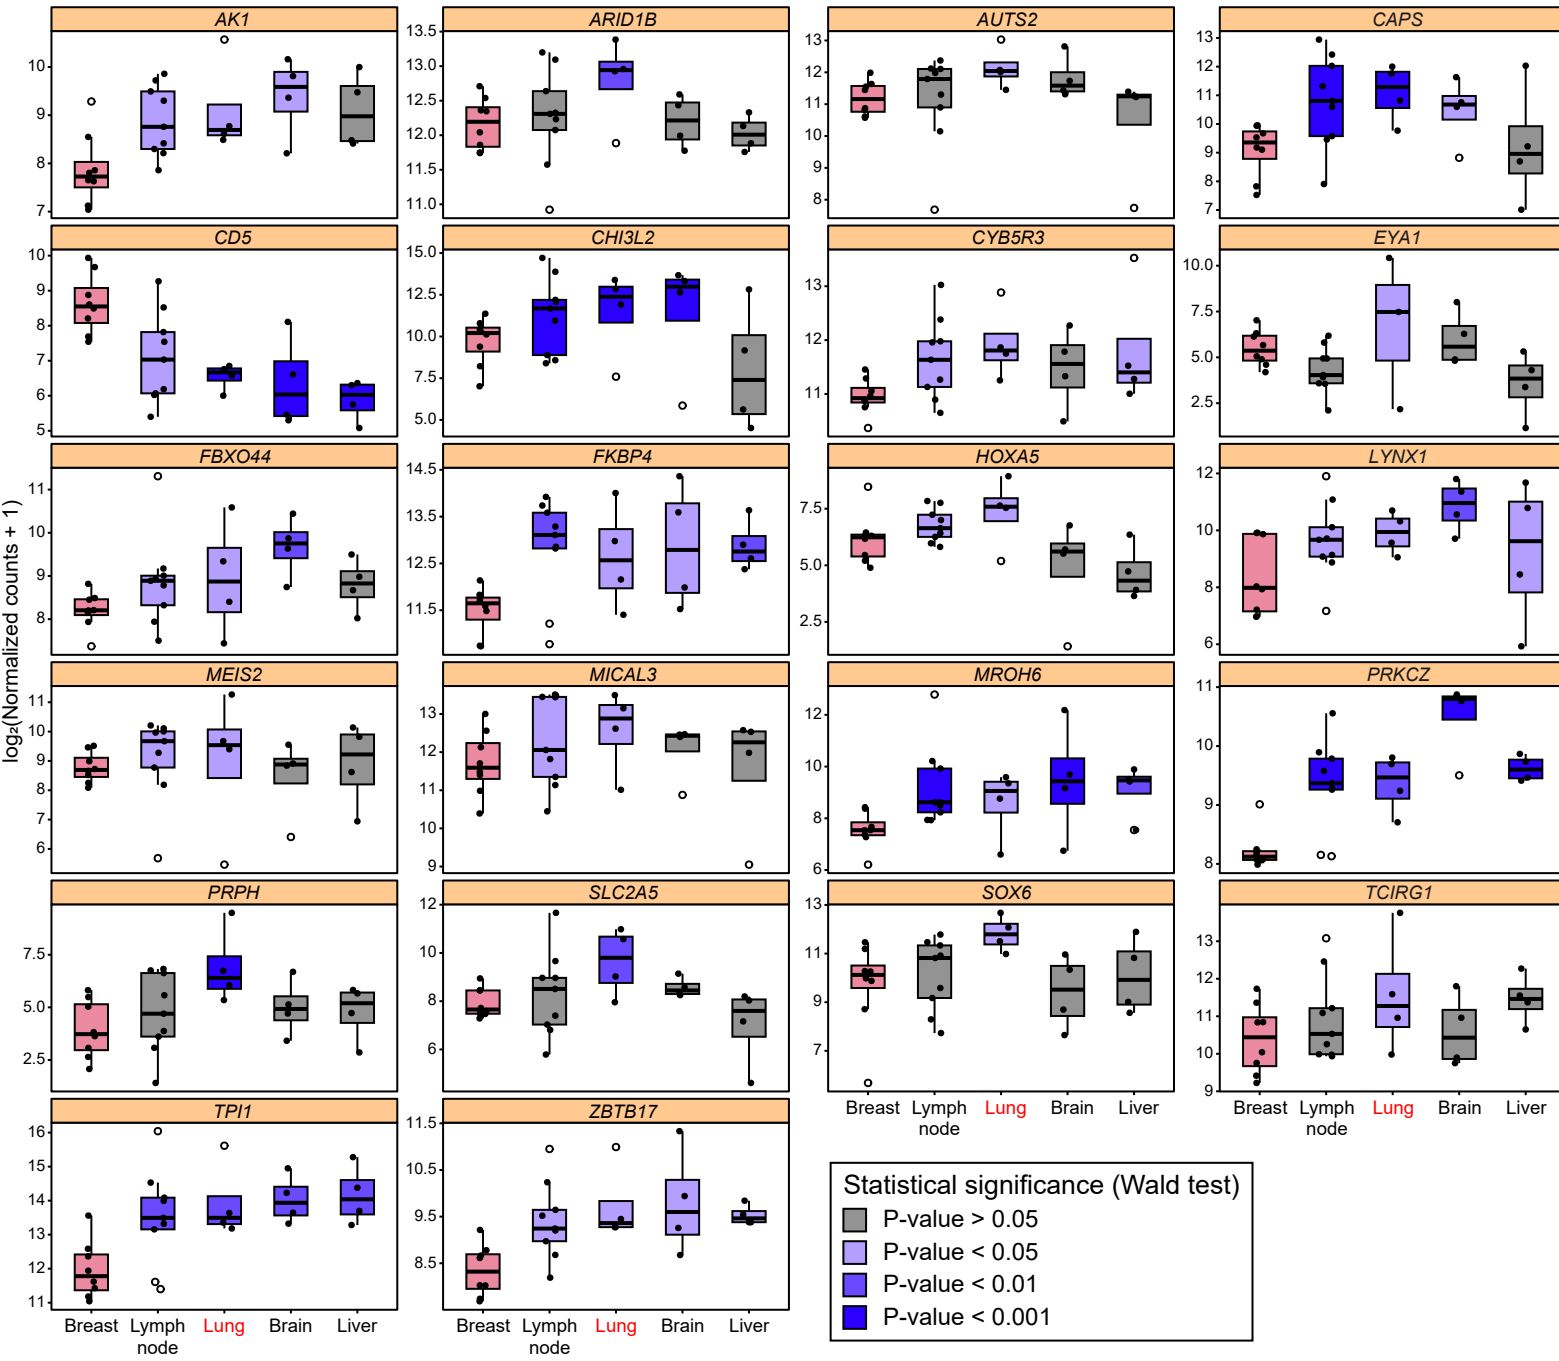

**Supplementary Figure 4: Boxplots showing expression patterns of epigenetically regulated genes in TNBC metastases across different tissue sites from the AURORA US cohort.** Statistical significance was determined with the DESeq2 Wald test, with gradient purple shades indicating  $P < 0.05$ ,  $P < 0.01$ , and  $P < 0.001$ .

Supplementary Figure 5

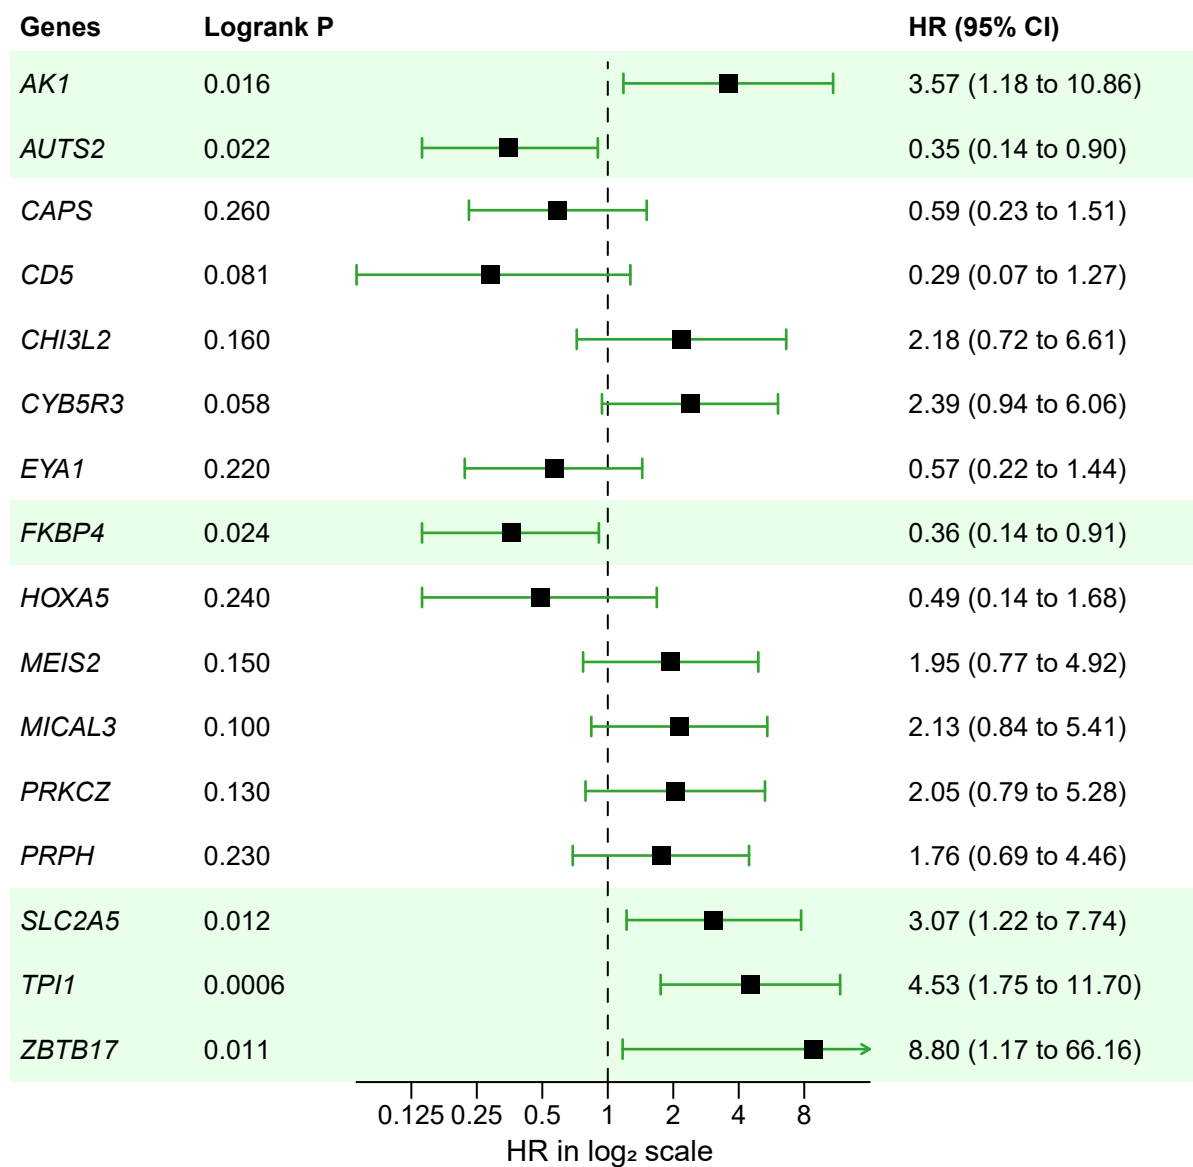

**Supplementary Figure 5. Prognostic impact of epigenetically regulated genes identified from the comparison between lung metastases and primary TNBC tumors.** Forest plot showing the association between gene expression and LMFS in TNBC primary tumors. It includes HR and 95% CI estimated from the associated unadjusted Cox proportional hazards model and the log-rank test P-value. Genes highlighted in green indicate statistically significant associations.
