# Supplementary material for: Epigenetic programs shaping lung metastasis in triple-negative breast cancer
Source: Research Square preprint supplement (doi:10.21203/rs.3.rs-7659153/v1), 2025-11-05
Supplement: Supplementary file 2 [file a7f16da025d5ea7d1c08b7c9.xlsx]

## Sheet: Supplementary Table 1
Supplementary Table 1. Clinical data from cases employed in the evaluation of TNBC metastases from the AURORA US cohort.
Patient	Sample Barcode	Sample Type	Treatment	Anatomic Site	Profiled ER	Profiled HER2	Profiled PR	Inferred ER from RNA-seq	Inferred HER2 from RNA-seq	Inferred PR from RNA-seq
AD9G	AUR-AD9G-TTP1-B	Primary	Pre-treatment	Breast	Negative	Negative	Negative	Negative	Negative	Negative
AD9G	AUR-AD9G-TTM3-A	Metastasis	Metastasis	Adrenal				Negative	Negative	Negative
AE5H	AUR-AE5H-TTP1-A	Primary	Pre-treatment	Breast	Negative	Negative	Negative	Negative	Negative	Negative
AE5H	AUR-AE5H-TTM1-A	Metastasis	Metastasis	Skin	Negative	Negative	Negative	Negative	Negative	Negative
AE6X	AUR-AE6X-TTM1-A	Metastasis	Metastasis	Liver	Negative	Negative	Negative	Negative	Negative	Negative
AE6Y	AUR-AE6Y-TTM1-A	Metastasis	Metastasis	Lung	Negative	Negative	Negative	Negative	Negative	Negative
AER6	AUR-AER6-TTM9-A	Metastasis	Metastasis	Liver				Negative	Negative	Negative
AER6	AUR-AER6-TTM7-A	Metastasis	Metastasis	Soft tissue				Negative	Negative	Negative
AER6	AUR-AER6-TTM3-A	Metastasis	Metastasis	Diaphragm				Negative	Negative	Negative
AER6	AUR-AER6-TTM1-A	Metastasis	Metastasis	Skin	Negative	Negative	Negative	Negative	Negative	Negative
AER7	AUR-AER7-TTM4-A	Metastasis	Metastasis	Lymph node				Negative	Negative	Negative
AF95	AUR-AF95-TTP1-A	Primary	Pre-treatment	Breast	Negative	Negative	Negative	Negative	Negative	Negative
AF95	AUR-AF95-TTM1-A	Metastasis	Metastasis	Chest	Negative	Negative	Negative	Negative	Negative	Negative
AFE5	AUR-AFE5-TTM9-A	Metastasis	Metastasis	Spleen				Negative	Negative	Negative
AFE5	AUR-AFE5-TTM4-A	Metastasis	Metastasis	Lymph node				Negative	Negative	Negative
AFE6	AUR-AFE6-TTM2-A	Metastasis	Metastasis	Lung				Negative	Negative	Negative
AFE6	AUR-AFE6-TTM1-A	Metastasis	Metastasis	Chest				Negative	Negative	Negative
AFE7	AUR-AFE7-TTM3-A	Metastasis	Metastasis	Lung				Negative	Negative	Negative
AFE7	AUR-AFE7-TTM2-A	Metastasis	Metastasis	Lymph node				Negative	Negative	Negative
AFE7	AUR-AFE7-TTM1-A	Metastasis	Metastasis	Lymph node				Negative	Negative	Negative
AFE9	AUR-AFE9-TTM4-A	Metastasis	Metastasis	Liver	Negative	Negative	Negative	Negative	Negative	Negative
AFEA	AUR-AFEA-TTM6-A	Metastasis	Metastasis	Lymph node				Negative	Negative	Negative
AFEA	AUR-AFEA-TTM4-A	Metastasis	Metastasis	Lymph node	Negative	Negative	Negative	Negative	Negative	Negative
AFEA	AUR-AFEA-TTM3-A	Metastasis	Metastasis	Lung				Negative	Negative	Negative
AFEA	AUR-AFEA-TTM2-A	Metastasis	Metastasis	Brain				Negative	Negative	Negative
AFEA	AUR-AFEA-TTM1-A	Metastasis	Metastasis	Brain				Negative	Negative	Negative
AFEC	AUR-AFEC-TTM6-A	Metastasis	Metastasis	Pleura				Negative	Negative	Negative
AFEC	AUR-AFEC-TTM4-A	Metastasis	Metastasis	Lymph node				Negative	Negative	Negative
AFEC	AUR-AFEC-TTM3-A	Metastasis	Metastasis	Liver				Negative	Negative	Negative
AFR4	AUR-AFR4-TTM1-A	Metastasis	Metastasis	Brain				Negative	Negative	Negative
AFR5	AUR-AFR5-TTM1-A	Metastasis	Metastasis	Brain	Negative	Negative	Negative	Negative	Negative	Negative
AFSL	AUR-AFSL-TTM1-A	Metastasis	Metastasis	Lymph node				Negative	Negative	Negative
AFUI	AUR-AFUI-TTP1-A	Primary	Pre-treatment	Breast	Negative	Negative	Negative	Negative	Negative	Negative
AFUM	AUR-AFUM-TTM1-A	Metastasis	Metastasis	Bone	Negative	Negative	Negative	Negative	Negative	Negative
AG0J	AUR-AG0J-TTP1-A	Primary	Pre-treatment	Breast	Negative	Negative	Negative	Negative	Negative	Negative
AG0J	AUR-AG0J-TTM1-A	Metastasis	Metastasis	Soft tissue	Negative	Negative	Negative	Negative	Negative	Negative
AG0M	AUR-AG0M-TTM1-A	Metastasis	Metastasis	Chest	Negative	Negative	Negative	Negative	Negative	Negative
AG0N	AUR-AG0N-TTP1-A	Primary	Pre-treatment	Breast	Negative	Negative	Negative	Negative	Negative	Negative
AG0N	AUR-AG0N-TTM1-A	Metastasis	Metastasis	Lymph node	Negative	Negative	Negative	Negative	Negative	Negative
